# Supplementary material for: Tomato fruits expressing a bacterial feedback-insensitive 3-deoxy-d-arabino-heptulosonate 7-phosphate synthase of the shikimate pathway possess enhanced levels of multiple specialized metabolites and upgraded aroma
Source: PubMed Central journal article supplement (PMC3808321; doi:10.1093/jxb/ert250), 2013-09-04
Supplement: supp_ert250_jexbot100875_file002.pdf [file supp_ert250_jexbot100875_file002.pdf]

Fig. S1

A)

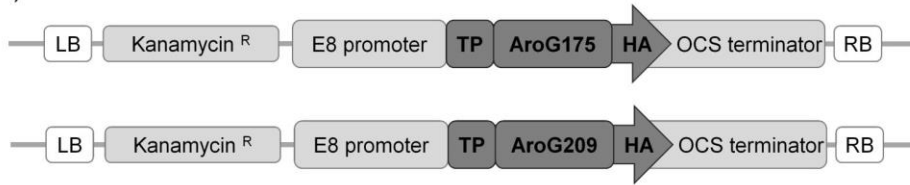

B)

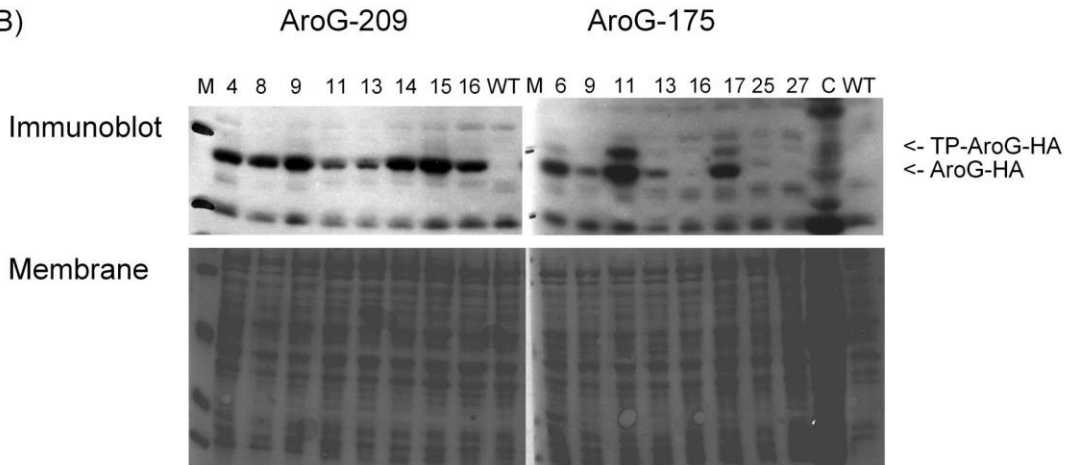

**Supplementary Fig. S1. Expression of the bacterial *AroG* gene in transgenic tomato.** A)

Schematic diagram of the chimeric *AroG* gene. E8 fruit specific promoter; TP, plastid transit peptide; *AroG*, the bacterial *DAHPS* including three variance: mutant variances in amino acid located at 175 and 209 respectively. HA, three copies of the hemagglutinin epitope tag; OCS, octopine synthase terminator. B) Immunoblot analysis of protein extracts from independently transformed lines reacted with anti HA antibodies. The upper band (TP-*AroG*-HA) represents the precursor polypeptide (as detected in *AroG*<sub>175-11</sub>), while the lower band (*AroG*-HA) represents the mature polypeptide. Loading WT showed comparable levels of stained proteins in the different lanes. Abbreviations: M, marker and C, WT.

Fig. S2

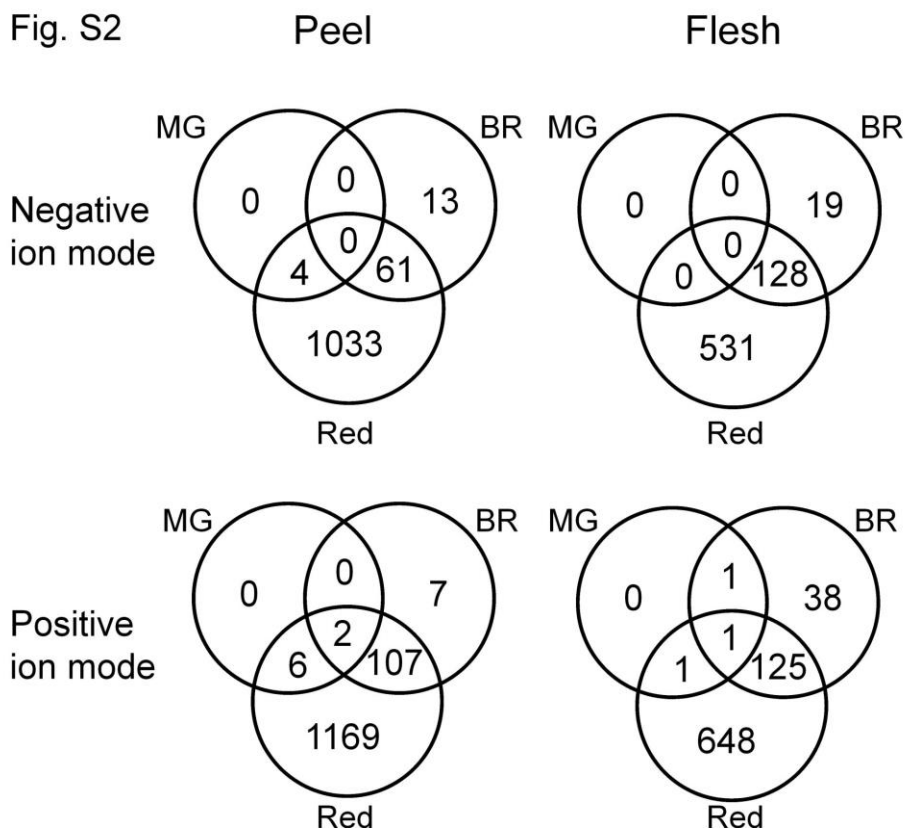

**Supplementary Fig. S2. Venn diagram compares the mass signals changes between three developing stages of peel and flesh tomato tissue detected by high-resolution LC-MS.** A Venn diagram is showing the relations between the differential mass signals in at least one out of three developing stages in two ionization modes in *AroG<sub>209.9</sub>* transgenic tomato peel and flesh tissues. The total number of mass signals that were significantly altered and used for the Venn diagrams are: (i) peel negative ion mode - 1,111; (ii) flesh negative ion mode - 678; (iii) peel positive ion mode - 1291 and (iv) flesh positive ion mode - 841. MG: mature green; BR: breaker; Red: ripe red.

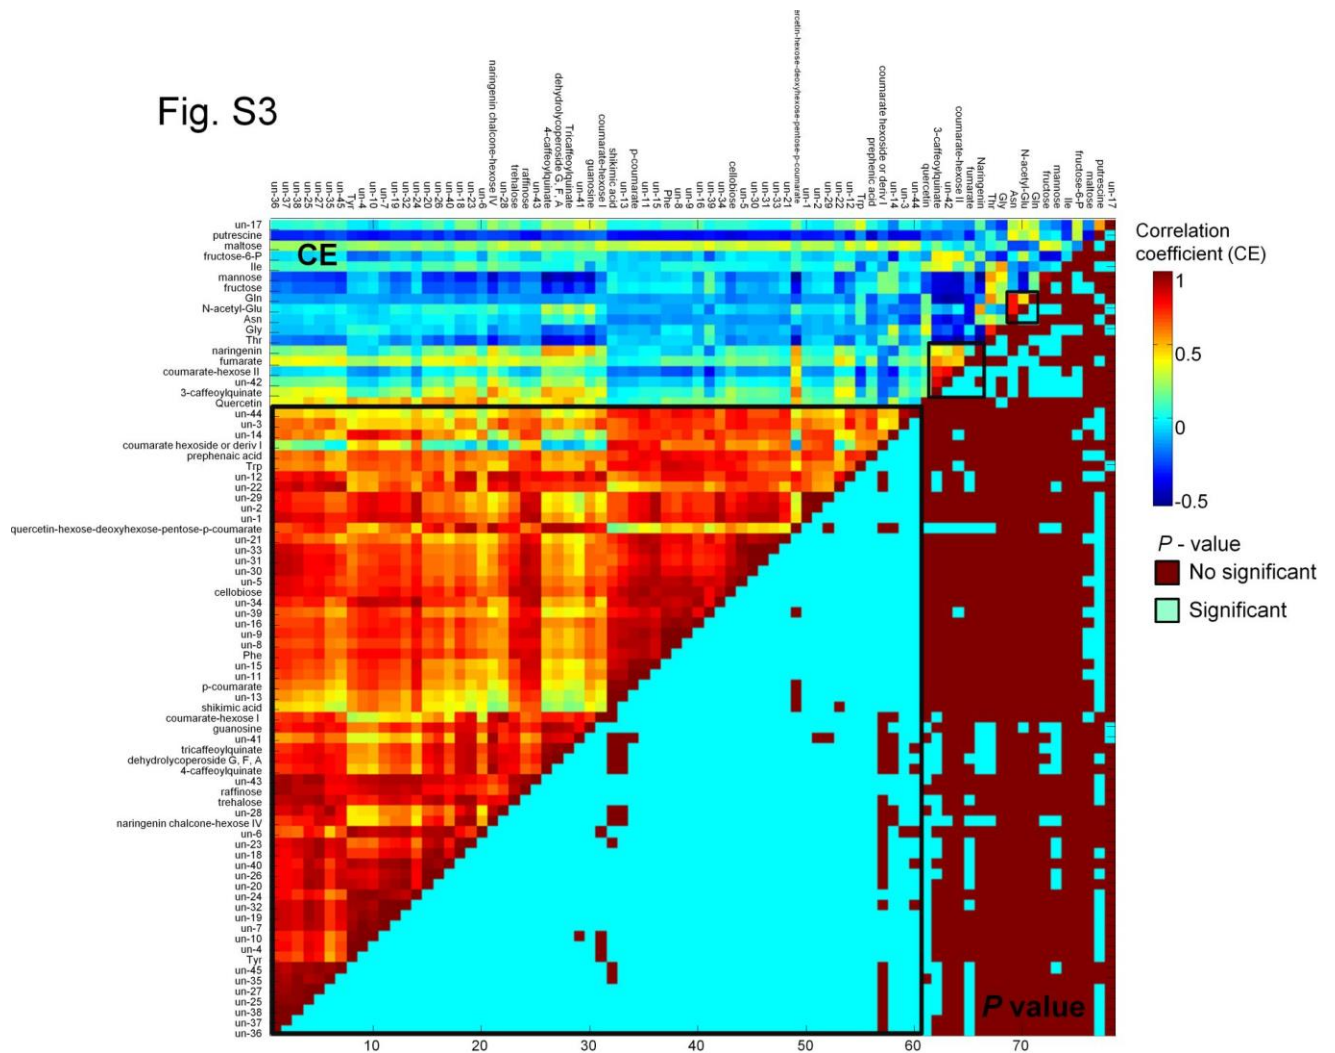

**Supplementary Fig. S3.** Correlation coefficient values of significant altered metabolites detected by of GC-MS (18) and LC-MS (15) and unknown mass signals (45). Metabolites and mass signals levels were identified and measured of three developing stages in two ion modes in *AroG<sub>209-9</sub>* transgenic tomato peel and flesh compare to WT (n=5-6). The upper triangle matrix presents Pearson's correlation (scale -0.5 to 1) and lower triangle matrix presents *P*-value of the correlation coefficient test (light blue present *P* value <0.01 and brown present non-significant). The heat map was performed using MATLAB software.

Fig. S4

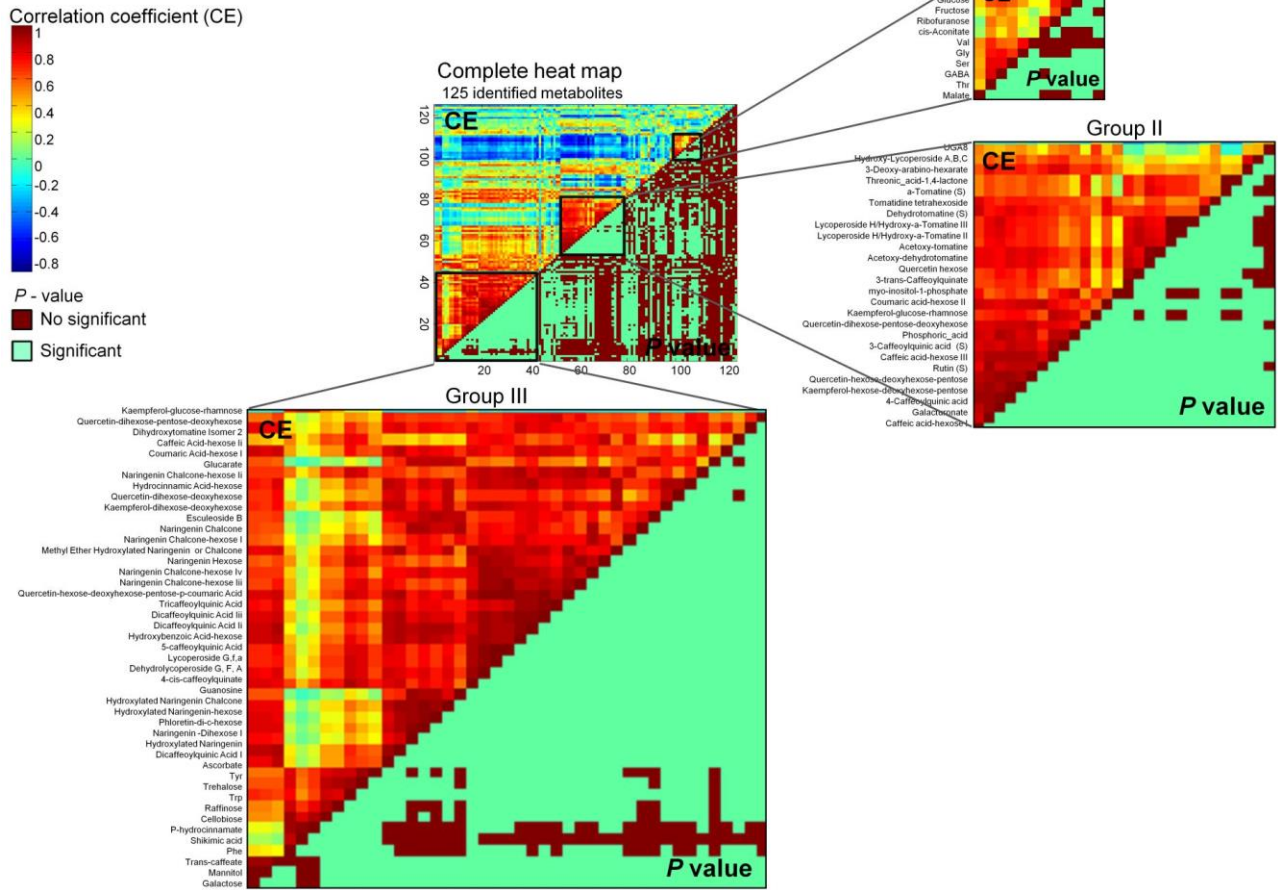

**Supplementary Fig. S4.** Correlation coefficient values of identify compounds detected by of GC-MS (61) and LC-MS (64). Metabolites and mass signals levels were identified and measured of three developing stages in two ion modes in *AroG<sub>209-9</sub>* transgenic tomato peel and flesh compare to WT (n=5-6);. The upper triangle matrix presents Pearson's correlation (scale -0.8 to 1) and lower triangle matrix presents *P*-value of the correlation coefficient test (light blue present *P* value <0.01 and brown present non-significant). The heat map was performed using MATLAB software.
